# Supplementary figures and images for: Molecular Co-Chaperone SGT1 Is Critical for Cell-to-Cell Movement and Systemic Infection of Tomato Spotted Wilt Virus in Nicotiana benthamiana
Source: MDPI journal article supplement (doi:10.3390/v10110647), 2018-11-17

**A**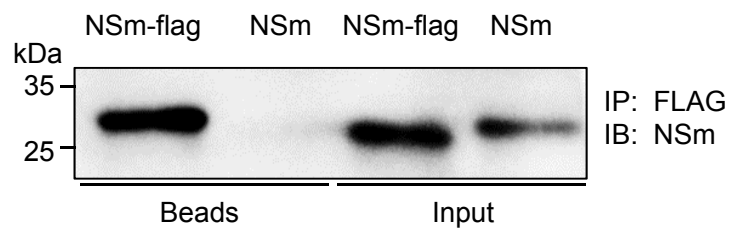**B**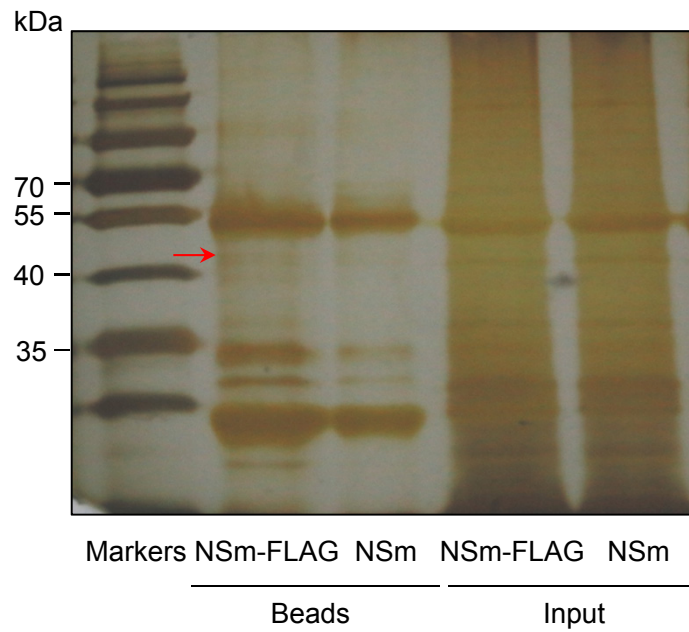**C**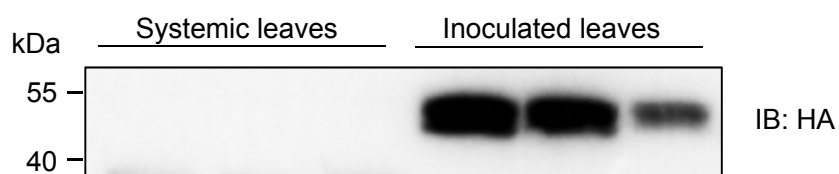**Figure S1.**

**A**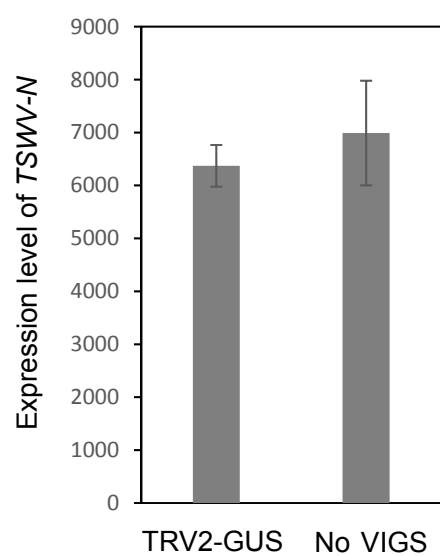**B**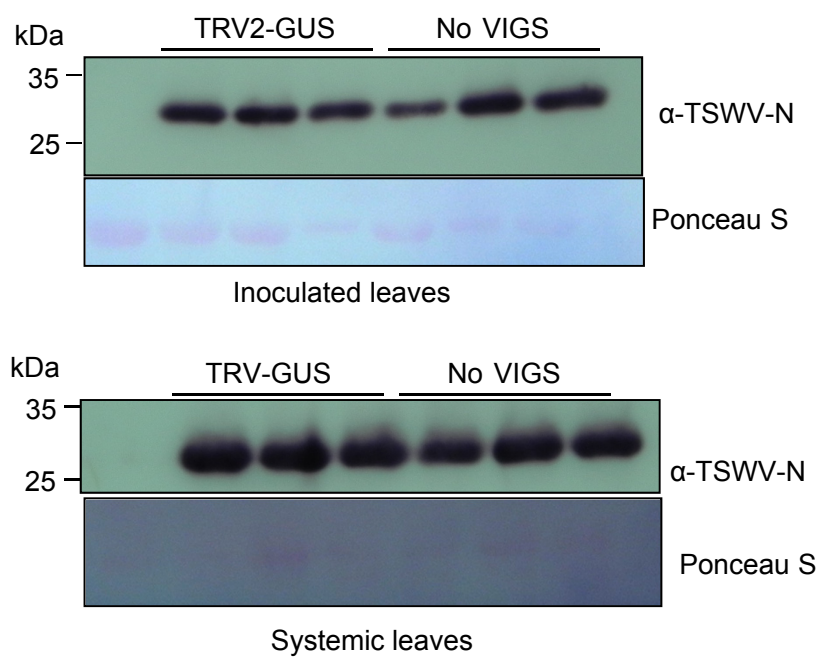**Figure S2.**

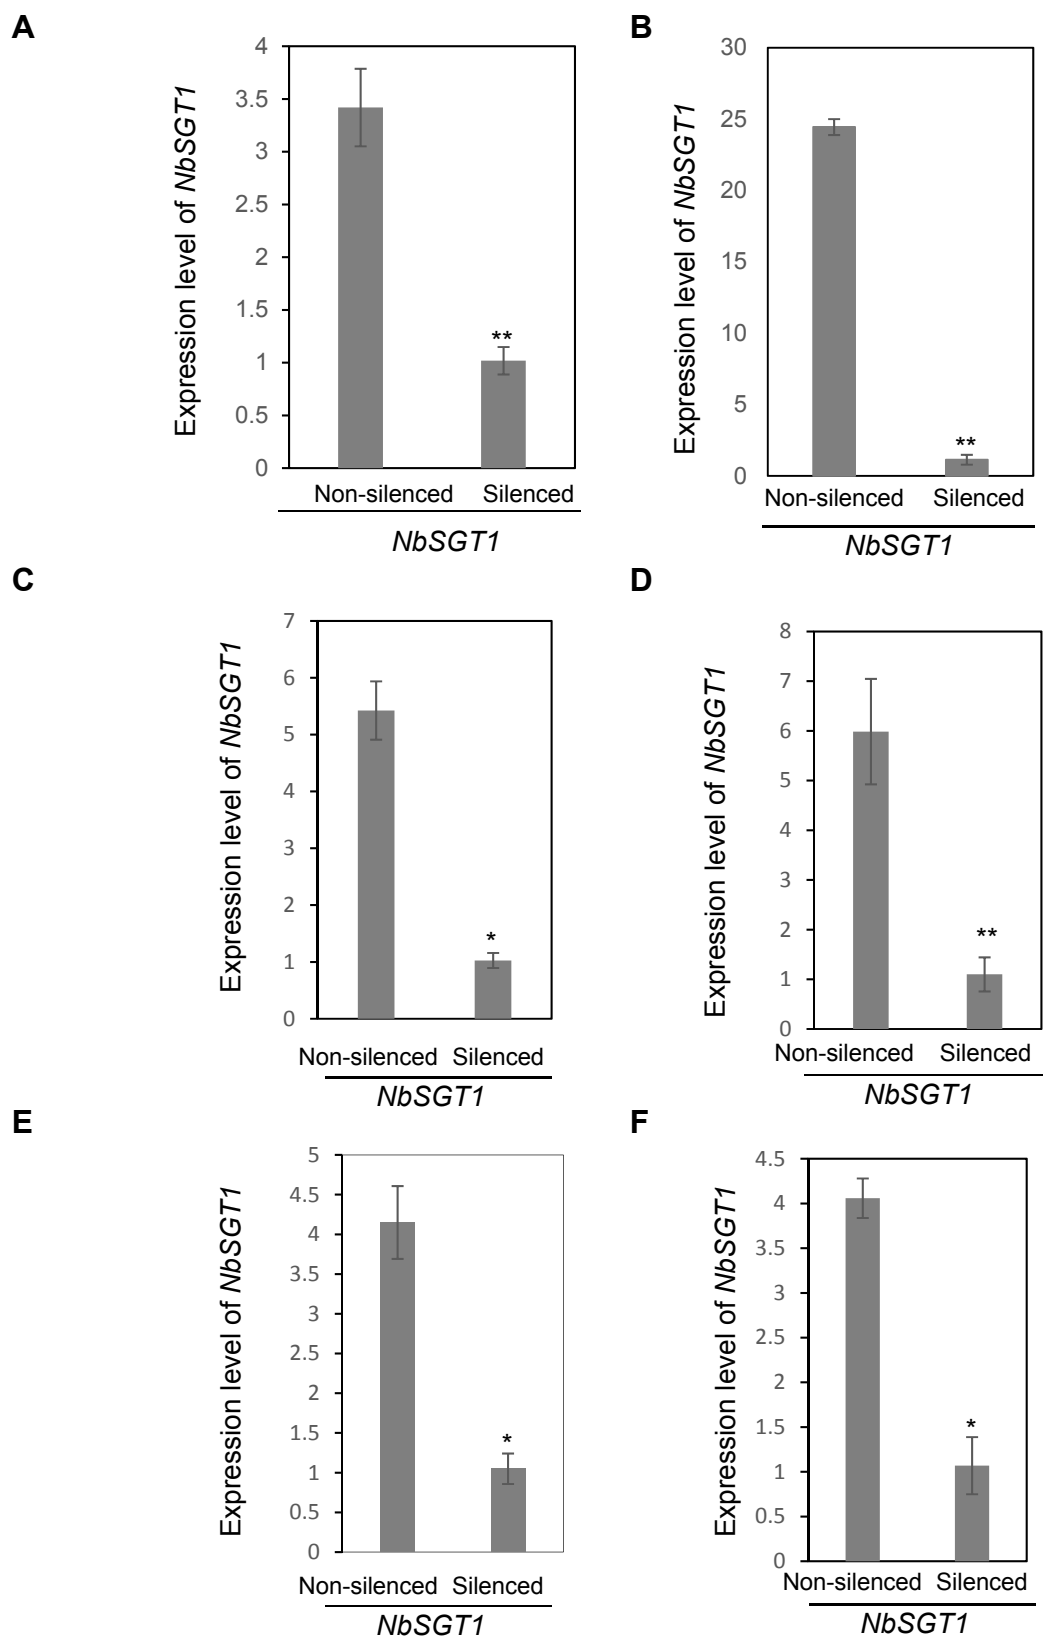

Figure S3.

**A**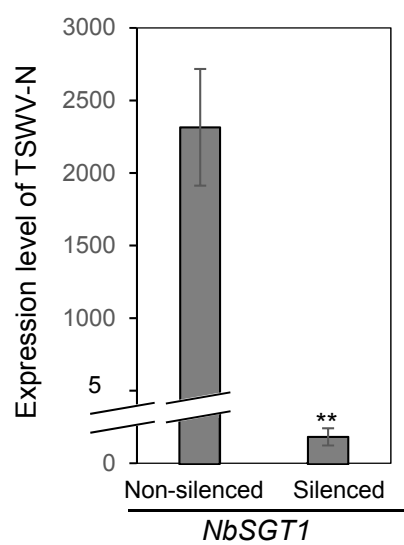**B**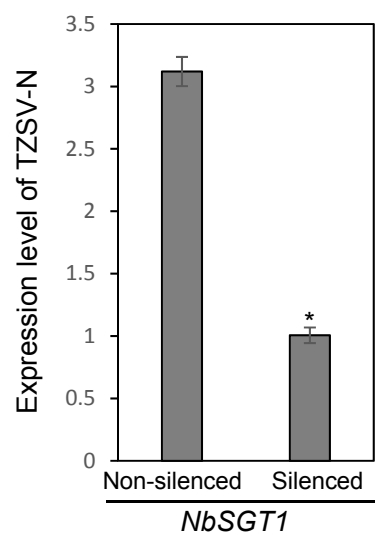**C**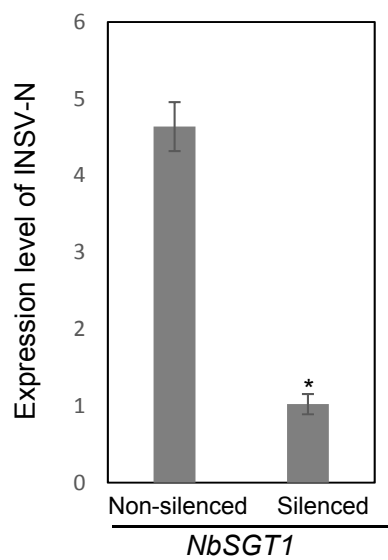

Supplement: s1 [file s1]
